# Supplementary material for: A serial optical frequency-domain imaging study of early and late vascular responses to bioresorbable-polymer sirolimus-eluting stents for the treatment of acute myocardial infarction and stable coronary artery disease patients: results of the MECHANISM-ULTIMASTER study
Source: Springer Nature journal article supplement (doi:10.1007/s12928-021-00777-4), 2021-04-25
Supplement: MOESM1 [file 19103472]

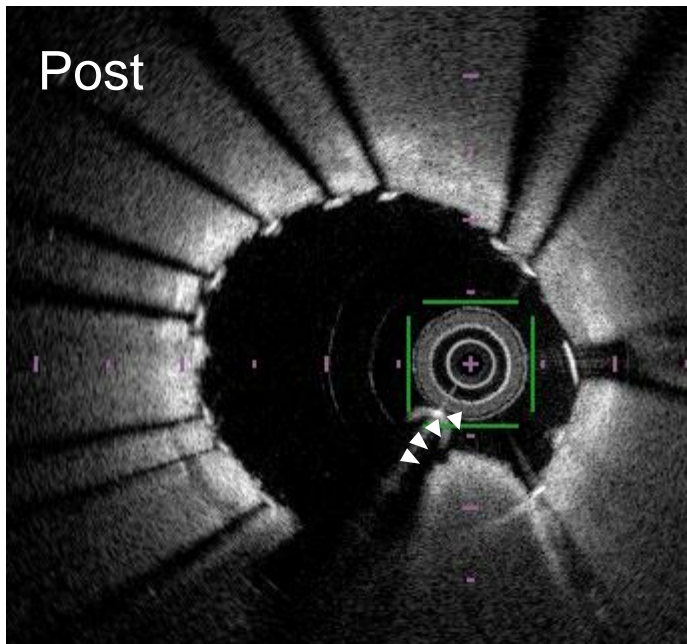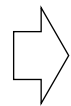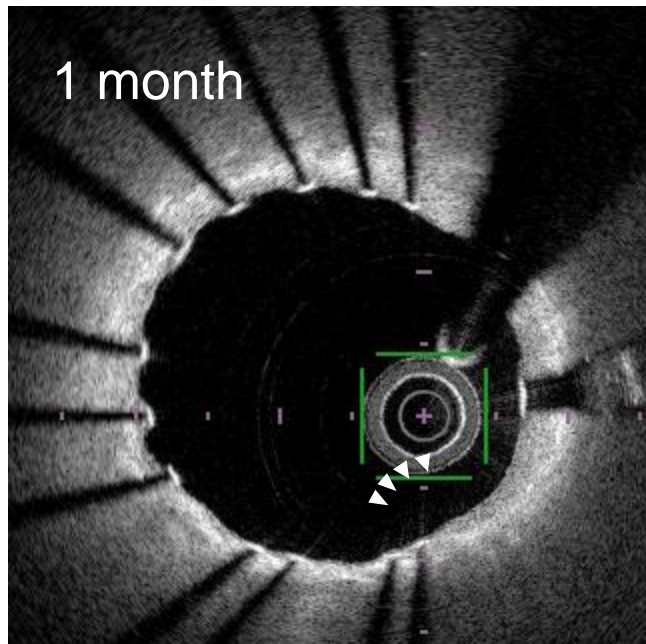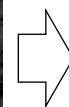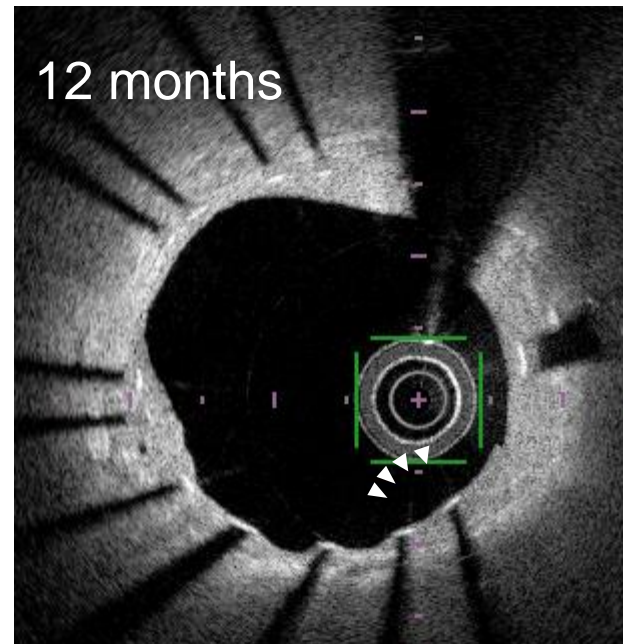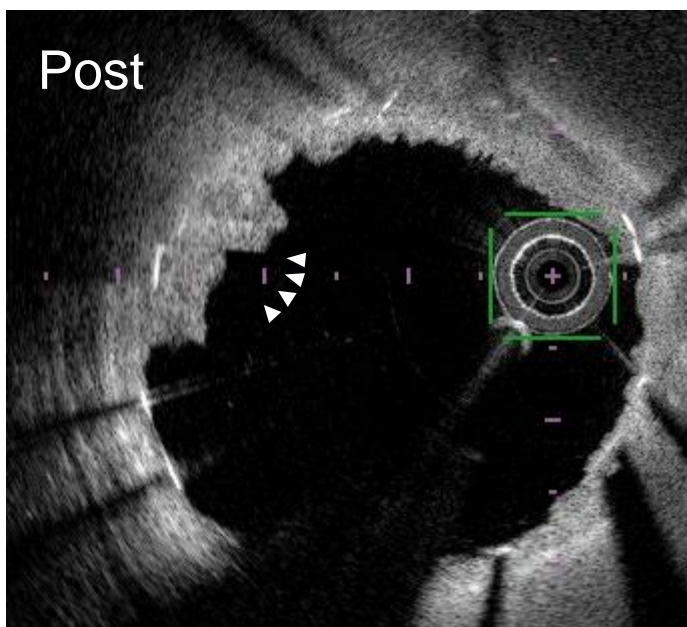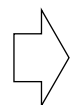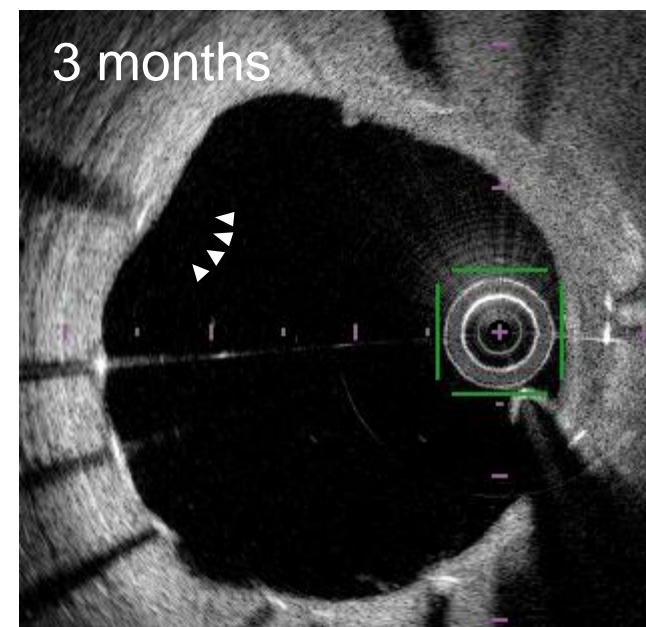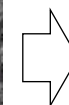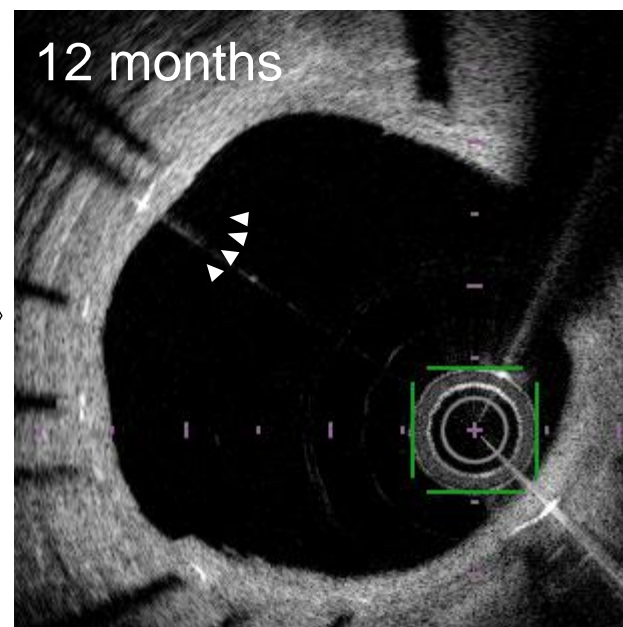

Supplemental Figure 1 (a)

Representative cases of STEMI

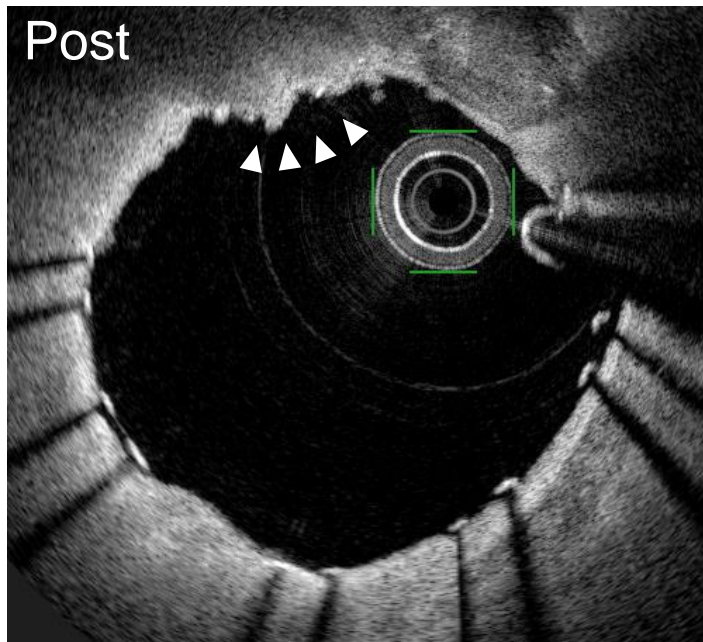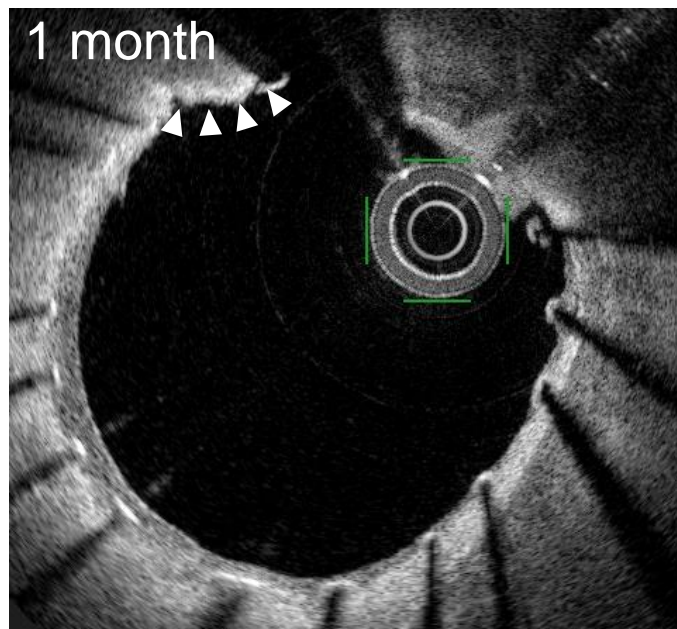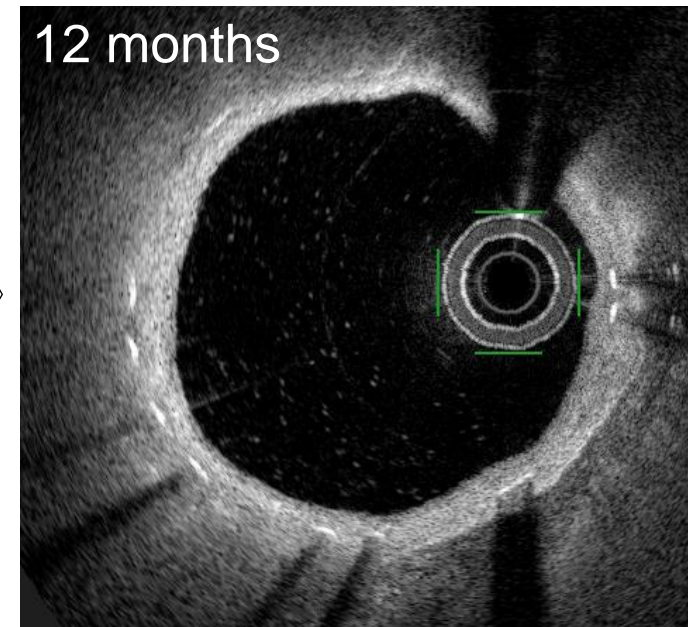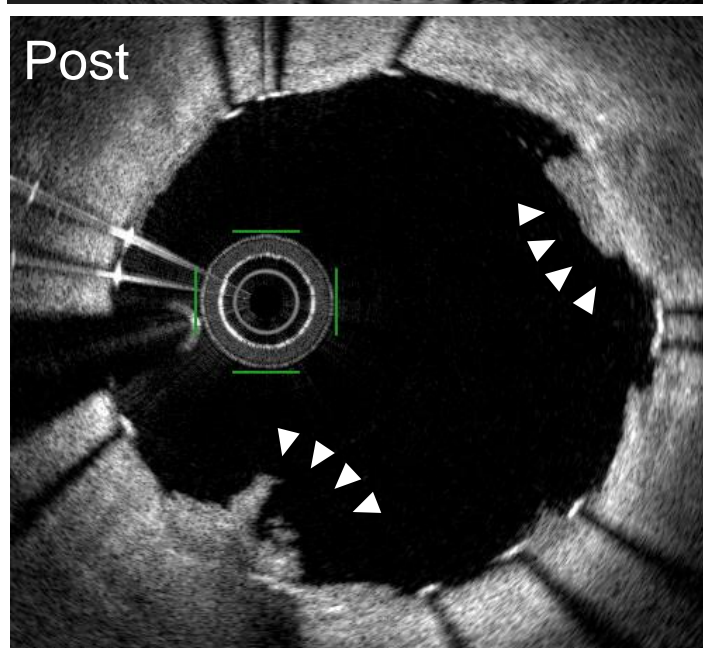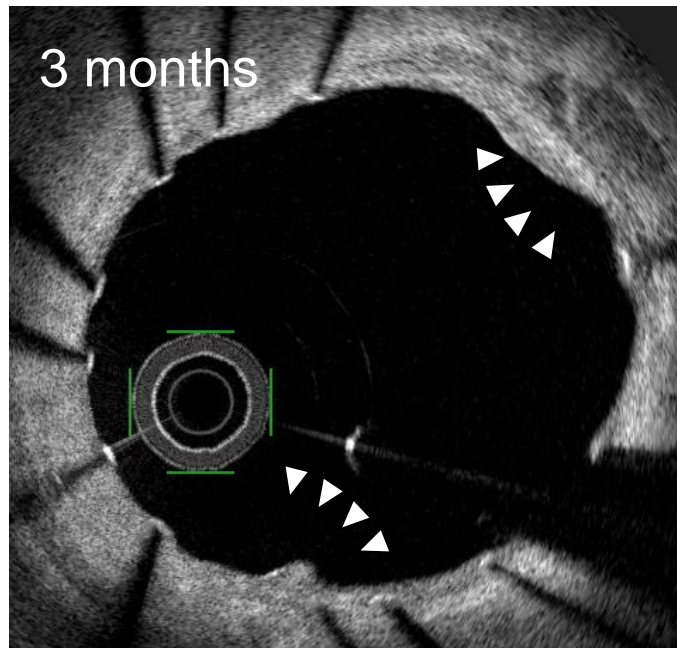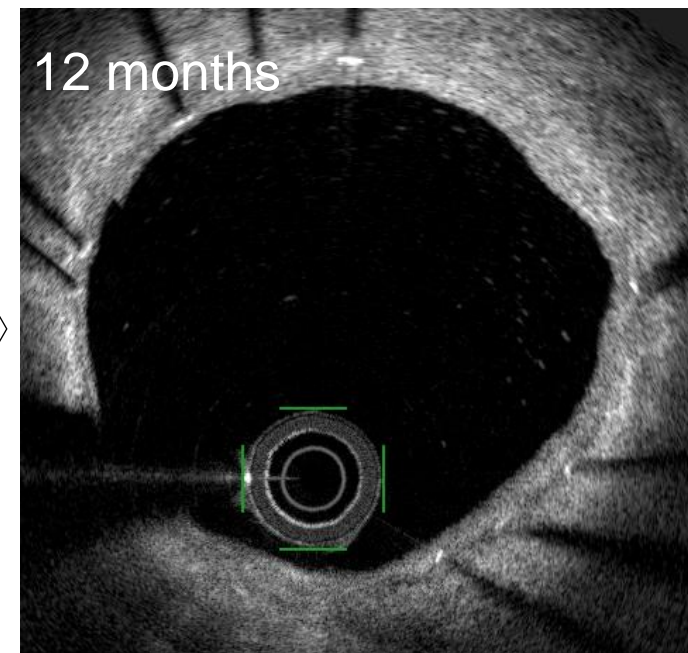

Supplemental Figure 1 (b)

Representative cases of stable CAD
